---

# GENETIC DESIGN AUTOMATION FOR AUTONOMOUS FORMATION OF MULTICELLULAR SHAPES FROM A SINGLE CELL PROGENITOR

---

A PREPRINT

Evan Appleton<sup>1,2,+</sup>, Noushin Mehdipour<sup>3,+</sup>, Tristan Daifuku<sup>1,2,+</sup>, Demarcus Briers<sup>3,4,+</sup>, Iman Haghghi<sup>3,+</sup>,  
Michael Moret<sup>1,2</sup>, George Chao<sup>1,2</sup>, Timothy Wannier<sup>1,2</sup>, Anush Chiappino-Pepe<sup>1,2</sup>,  
Jeremy Huang<sup>1,2</sup>, Calin Belta<sup>3</sup>, and George Church<sup>1,2</sup>

<sup>1</sup>Wyss Institute for Biologically Inspired Engineering at Harvard University, Boston, Massachusetts, USA

<sup>2</sup>Department of Genetics, Harvard Medical School, Boston, Massachusetts, USA

<sup>3</sup>Department of Systems Engineering, Boston University, Boston, Massachusetts, USA

<sup>4</sup>Bioinformatics Program, Boston University, Boston, Massachusetts, USA

<sup>+</sup>These authors contributed equally

\*Correspondences addressed to [evan\\_appleton@hms.harvard.edu](mailto:evan_appleton@hms.harvard.edu), [cbelta@bu.edu](mailto:cbelta@bu.edu), and [gchurch@genetics.med.harvard.edu](mailto:gchurch@genetics.med.harvard.edu)

September 18, 2020

## ABSTRACT

1 Multi-cellular organisms originate from a single cell, ultimately giving rise to mature organisms of  
2 heterogeneous cell type composition in complex structures. Recent work in the areas of stem cell  
3 biology and tissue engineering have laid major groundwork in the ability to convert certain types of  
4 cells into other types, but there has been limited progress in the ability to control the morphology of  
5 cellular masses as they grow. Contemporary approaches to this problem have included the use of  
6 artificial scaffolds, 3D bioprinting, and complex media formulations, however, there are no existing  
7 approaches to controlling this process purely through genetics and from a single-cell starting point.  
8 Here we describe a computer-aided design approach for designing recombinase-based genetic circuits  
9 for controlling the formation of multi-cellular masses into arbitrary shapes in human cells.

10 **Keywords** Developmental biology · Synthetic biology · Computer-aided design · Multi-cellular structures

## 11 1 Introduction

12 Developmental biology is the study of the process by which multi-cellular organisms grow and differentiate. All of  
13 these processes can be traced back to a single ‘totipotent stem cell’ from which all differentiated cells originate. These  
14 single cells robustly divide and differentiate with impeccable accuracy based on the genetics of this original cell and  
15 its surrounding environment. While it is understood that this process happens in different ways for each organism,  
16 many of the critical steps along the way are not well understood. Furthermore, the ability to coerce cells to develop in  
17 ways outside of the normal developmental context (i.e. stem cell engineering) is relatively nascent. The fields of stem  
18 cell biology, regenerative biology, and tissue engineering have long-term goals for using the knowledge of how cells  
19 and organisms develop to create novel solutions for disease modeling, drug testing, organ replacement, among other  
20 applications [1].

21 While most of these applications are still currently science-fiction, there have been significant advancements in the  
22 basic foundations on which these goals could be accomplished. Namely, the field of stem cell biology has been very  
23 active in producing methods for differentiating stem cells into other types of cells following the breakthrough creation  
24 of induced pluripotent stem cells (iPSCs) [2]. These methods span from using over-expression of transcription factors  
25 [3], to recapitulating the natural developmental environment with engineered surface conditions and complex media  
26 with growth factors [4], to using 3D bioprinters to place different types of cells in specific locations [5]. Recently, these  
27 types of approaches have even been used to engineer small organ-resembling masses called ‘organoids’ [1, 6].

28 To date, there have been clear advances in the ability to differentiate cells into different types, but there is still a major  
29 struggle to steer cells into forming structured cellular masses that perform a systematic organ-like function. Furthermore,  
30 repeatability of the formation of structures as cells grow has been problematic. Recent efforts in human stem cell  
31 biology have demonstrated the successful recapitulation of development of human embryos *in vitro* up to 13 days  
32 post-fertilization [7, 8] but again, there is no control over the morphology formed at this small scale. 3D bioprinting is  
33 one proposed solution to this problem, but this does not always integrate well with genetic processes because placing  
34 different types of cells physically next to each other does not necessarily mean that the cells will behave as intended,  
35 had they been produced via cell divisions and genetic control.

36 One possible solution to these obstacles would be to create genetics-controlled methods to control both cellular identity  
37 and morphology. In such a solution, structures could form seamlessly as cells divide, with identity changes also  
38 controlled genetically. This approach would require synthetic DNA to force cells to form structures and change identity.  
39 Fortunately, there are many examples of using genetics to force cell type conversions - the primary knowledge gap  
40 is how to use genetics to inform shape formation. Some preliminary work has been done in this area using cadherin  
41 surface binding proteins and cell-signaling [9], but this problem is still relatively unexplored.

42 In order to build genetic solutions to both cell identity control and shape control, one would need to integrate recent  
43 advances in the areas of synthetic biology, modeling, and computer-aided design (CAD) to build ‘genetic circuits’  
44 for this purpose. In synthetic biology, genetic circuits are compositions of DNA fragments that each independently  
45 produce a cellular function (i.e. transcription, translation, etc.). When stitched together, these circuits can perform a  
46 more sophisticated function [10, 11, 12, 13]. Over the past 20 years, many genetic circuit design components have  
47 been thoroughly characterized and design principles have been established [14]. More recently, design automation and  
48 modeling have been used to automatically design genetic circuits from a library of characterized components [15, 16],  
49 giving rise to a variety of successful large, complex constructs in a variety of organisms [17, 18, 19, 20].

50 Here we describe a computer-aided design software tool, called *CellArchitect*, that uses design automation approaches to  
51 design genetic circuits to control the shape formation of multi-cellular masses originating from a single cell (**Figure 1**).  
52 To do this, we first breakdown this large problem into smaller sub-problems related to cellular development. Specifically,  
53 we identified and solved the following sub-problems: selection of orthogonal cell surface binders to form a shape,  
54 definition of a ‘developmental tree’ that maps a cellular population back to its original progenitor, automated design of  
55 recombinase-based genetic circuits to control when during development specific genes are expressed, and modeling of  
56 cell growth with these genetic circuits integrated into their genome. We make the argument that even if our current  
57 solutions are not optimal for forming all shapes, that a computer-aided design solution is needed to attempt these types  
58 of problems — human cells divide and differentiate so slowly that it would take an intractable amount of time and  
59 money to attempt to solve these problems through trial-and-error. As a proof of principle, we focus on a few small  
60 examples of shapes that could be formed with these tools and the sub-problem solutions for their respective genetic  
61 circuit design process. Since our input to these tools is a shape and the output is a DNA sequence, these circuits can be  
62 directly synthesized and tested in the laboratory.

## 63 2 Results

### 64 2.1 Decomposing large shapes into cellular blocks

65 The first sub-problem to address when solving how to form large structures of many cells, is how to break these cells  
66 into more easily built sub-structures (**Figure 1**). In our software framework, we choose to solve this problem using an  
67 approach called meshing - subdividing continuous geometric space into discrete geometric and topological units. This  
68 strategy is used in engineering fields for different types of analyses [21, 22], but in our case we use it to divide tessellate  
69 3D-space into discrete tetrahedrons (‘tets’) and cubes (‘quads’). We result in shapes made of these geometric elements  
70 that resemble the original shape in an arbitrary amount of granularity (**Figure 2**). We choose to represent larger objects  
71 as compositions of tets and quads because we have identified these as achievable building blocks from the 4-cell and  
72 8-cell stage of early embryonic development. The overall strategy is to represent large shapes as sets of ‘cellular blocks’  
73 that can be individually created and stuck together with a calculated choice of orthogonal surface-binding proteins  
74 [23, 24].

75 The input file to this part of the workflow (and the workflow more generally) is an STL file [25], a standardized CAD file  
76 format in either ASCII or binary. This ‘shape file’ is the starting point from which the genetic circuit is determined, and  
77 is used a comparison to the multi-cellular results produced by the simulator and experimentally acquired microscopy  
78 data. These comparisons give a statistical metric of success for candidate genetic circuits and also a quantitative measure  
79 of success of experiments compared to what is desired in the shape specification step.

### 80 2.1.1 Creating cellular meshes

81 In order to break up user-provided target shapes into blocks of cells, we initially turned to the world of shape meshing  
82 algorithms. However, canonical shape meshing algorithms proved ill-suited to our application, as they generally  
83 prioritize shape fidelity over block consistency – that is, in order to achieve a mesh that strictly matches the original  
84 shape, the algorithms will choose blocks that are significantly deformed, or are of disparate volumes. Because we chose  
85 to model K562 cells as spheres of identical volumes, it was important to find a meshing technique that would instead  
86 prioritize generating blocks of regular shape and size.

87 For hexahedral meshing, this was as simple as overlaying a 3-dimensional grid of cubes over the target shape and  
88 retaining only those cubes that fell within the shape, thus ensuring that every cube was identical (**Figure 2a**). A similar  
89 method was used to create a tetrahedral mesh but, as regular tetrahedra do not tessellate space, it was necessary to  
90 instead overlay a tessellation of near-regular tetrahedra. We therefore implemented the “Irish” Tessellation [26] which  
91 tessellates space using 3 types of tetrahedra, the largest of which has a volume less than 13% larger than that of the  
92 smallest, and all of which have dihedral angles between 53.1 and 78.5 (a regular tetrahedron has a dihedral angle of  
93 70.5) (**Figure 2b**). As with the hexahedral meshing, only tetrahedra that fall within the shape are retained.

### 94 2.1.2 Minimization of orthogonal surface binding proteins

95 Once a cellular mesh has been created, we aim to minimize the number of orthogonal surface-binding proteins required  
96 to hold the desired shape. This is done because the number of well characterized orthogonal surface protein binders  
97 currently known is relatively small. This step takes a mesh for the desired shape as input and outputs a list of cell-cell  
98 connections required for the shape to be formed. We solve this problem with two alternative type of applied algorithms:  
99 a Maximum Leaf Spanning Tree (MLST) algorithm [27] and a Minimum Spanning Tree (MST) algorithm [28].

100 The first algorithm we use to minimize connections in a mesh is MLST [27]. The algorithm relies on maintaining lists  
101 of nodes (i.e. cell in a cellular block and its neighboring cells in the mesh) that qualify for different rules in a forest (i.e.  
102 MLST we are building):

103 Rule 1 Any node in the forest with at least two neighbors not in the forest.

104 Rule 2 Any node not in the forest that has at least one neighbor in the forest and at least three neighbors not in the  
105 forest.

106 Rule 3 Any node not in the forest with at least one neighbor in the forest and exactly two neighbors not in the forest.

107 Rule 4 Any node not in the forest with at least three neighbors also not in the forest.

108 Starting with a single seed node (i.e. cell in a cellular block and its neighboring cells in the mesh), the algorithm  
109 “expands” the forest to add nodes, prioritizing Rule 1 over Rule 2 over Rule 3 over Rule 4 (**Figure 2g**). The algorithm  
110 expands the forest until there are no more nodes in the rule lists, then looks for any node in the forest that has neighbors  
111 outside the forest and adds those neighbors. Next a breadth first search (BFS) on the forest is performed on the forest  
112 to determine if all nodes in the forest are connected. If they are not, the algorithm adds edges from nodes that are  
113 connected to the node BFS was run initiated at to the nodes that are not connected until the tree is connected. This  
114 algorithm generates a tree that maximizes the number of nodes (blocks) with only one connection, and can serve as a  
115 starting point for choosing block connections. It is hypothesized that having more leaves may lead to greater shape  
116 fidelity, as it would likely lead to a smaller, more dense, core shape. Moreover, when cell-surface binding proteins need  
117 to be reused within a shape, leaf blocks are logical candidates because they can all be identical.

118 The second algorithm we use to minimize cell block connections is a MST [28]. This algorithm finds a generic minimum  
119 spanning tree from an input 3D cell-block mesh mapped to a 2D graph. We then take this minimal graph and attempt  
120 to reduce “floppiness” by adding edges to minimize the number of nodes with only two connections. The algorithm  
121 begins by identifying problem nodes - the nodes with only 2 connections. It then considers all edges it could add to the  
122 graph to remove the problem (it identifies these options by comparing the original graph of all possible connections  
123 to the MST). Each edge is assigned a score. Edges that solve 2 problem nodes at once receive higher scores. Edges  
124 are penalized if they would inhibit other edges that solve 2 problems since we only wish to add one edge per problem  
125 node (this stipulation could be revisited). They are also penalized if they connect to leaves. Once these scores are  
126 assigned, the list of potential edges is sorted by their scores. Solution edges are added to the graph until there are no  
127 more potential edges or all of the problem nodes have been resolved (**Figure 2d-f**).

128 These two algorithms result in alternative connectivity solutions for the same input shape. Currently, the solution with  
129 the fewest required sets of orthogonal surface binding pairs is selected, but the algorithm that produces this answer  
130 is subject to the input shape. Finally, this graph is traversed and results in a list of cellular blocks, where each cell is  
131 required to have specific binding proteins.

## 132 2.2 Constructing a developmental tree from a list of cellular blocks

133 After determining a set of cellular blocks that could form and hold a shape, we must determine how these final cells will  
134 be formed from a single progenitor cell. To solve this problem we invented the idea of a ‘developmental tree’ - a map  
135 back from which all final cells arise from the original cell. This map tells us which progenitor cells must undergo certain  
136 biological processes en route to a final set of cells. The key behaviors that we consider in the context of this problem  
137 are asymmetrical cell divisions, cell surface binding protein expression, cell-cycle arrest and apoptosis. Asymmetrical  
138 cell division is key because unique shapes require heterogeneous cell populations, cell-surface binding proteins to form  
139 the shape, cell cycle arrest to stop cells dividing to hold a structure, and apoptosis to remove extra cells that are not  
140 needed for a structure. To solve this problem, we created an algorithm that inputs a set of cell-cell connections and  
141 outputs a tree illustrating which cells must exist over time to give rise to the correct final set of cells to create the input  
142 graph. It determines which surface proteins need to be expressed by each cell, then groups cells based on these proteins  
143 and determines a pathway to go from one cell to the final population.

144 The module begins by going through each block in the graph and determining the surface binders that need to be  
145 expressed by each of its cells. Tet blocks are bound together by a single homodimer. Quad blocks are bound together  
146 with three heterodimers: one binder to make a trigonal planar shape with four cells, another to make a second trigonal  
147 planar shape with the other four cells, and then the third binder to interlock the 3 outside cells of each trigonal planar  
148 shape (**Figure 3**). Connections between hex blocks are made using 2 homodimers, one at each end of a diagonal across  
149 the face of the cube. Care is taken to ensure that the orientations of the blocks relative to each other is preserved: this is  
150 achieved via a lookup table that correctly matches the corners of the two blocks. For tet blocks, one homodimer and  
151 one heterodimer are used to bind blocks, the heterodimer at two corners and the homodimer at the third. The relative  
152 orientation between two blocks is again preserved: binders are assigned to specific corners depending on which face is  
153 in play. In both the tet and hex cases, multiple binders are used to try to prevent rotation of blocks against each other.

154 Once all the binders have been assigned, the cells are sorted by the proteins they are expressing. Cells are added to the  
155 tree (stored in a list) starting at the bottom layer. If the final number of required cells is not a power of two, there will be  
156 two bottom layers. Note that any number of cells  $n \in \mathbb{N}$  can be obtained by building a perfect binary tree of height  
157  $k \in \mathbb{N}$  where  $2^{k-1} \leq n < 2^k$ , then having  $n - 2^{k-1}$  cells in the bottom layer of the tree divide once more, so we need  
158 at most two bottom layers. Cells at the bottom layer are then merged in pairs to create the preceding layer. The merging  
159 process determines if the two cells are identical, and can therefore be generated by a standard division, or if their  
160 proteins differ, and must therefore be generated by an asymmetrical division. This process is repeated until the top of  
161 the tree is reached. If there are two bottom layers, then the second lowest level will contain a mix of cells that must  
162 divide again and cells that are in their final state. As each layer is created, it is appended in order, cell by cell, to the list  
163 containing the developmental tree, with each cell containing a code —  $-1$  for no division,  $-2$  for standard division,  
164 and  $-3$  for asymmetrical division — as well as the set of expressed proteins (surface binders and fluorescent proteins)  
165 determined previously. The tree in this format can easily be read from right to left to pull out the information on tree  
166 structure: the top layer is in the last spot, the second layer is in the second and third to last spots, and so on, with each  
167 layer being read internally from left to right.

168 Finally, we perform one final optimization on this partially-complete developmental tree in attempt to maximize  
169 similarity of ancestor cells in order to minimize asymmetrical division events. We take a list of sets containing protein  
170 names where each set represents a cell and its expressed proteins, and we group cells based on the similarity of their  
171 sets of proteins. We begin by calculating the ratio of shared proteins to total proteins between every pair of cells and  
172 create an undirected graph where cells are nodes and the ratios are edge weights and then generate a hamiltonian path  
173 through the graph, using a greedy approach — we take the edge with the highest weight that does not violate the hamiltonian  
174 requirements until the path is complete.

## 175 2.3 Designing a genetic circuit from a developmental tree

176 To execute the genetic program of a given developmental tree, the cells must have a way in which to program specific  
177 genes to become expressed at discrete cell divisions. We choose to control this process through the use of genetic  
178 counting circuits. Specifically we use DNA recombinase components to invert and excise DNA [20, 19], cell cycle  
179 dependent promoters [29] and degradation tags [30] to have recombination events only once per cell cycle, and cell  
180 cycle-arrest [31] and apoptosis-inducing genes [32] (**Figure 4a**). We report our designs for genetic counter constructs  
181 that express specific recombinases in each cell cycle and genetic register constructs that manipulate which genes are  
182 expressed as a function of which recombinase is present in the cell (**Figure 5**). We describe three general options for  
183 counter and register constructs.



### 184 **2.3.1 A genetic counter circuit that counts cell divisions**

185 The counter construct drives the behavior of the register and can be designed in three ways: linear excision, linear  
186 inversion [13], and binary inversion. The linear options are simpler but you can only count as high as the number of  
187 orthogonal recombinases you have and the construct's DNA base length scales linearly with count number (**Figure 5**).  
188 To solve this problem, we invented a circuit architecture to count recombination events in a binary manner. The binary  
189 counter can count to  $2^n$  with  $n$  recombinases. We reason that since a human body has approximately 37 trillion cells,  
190 approximately 45 to 50 counts should be an adequate ceiling for counts required for a large hypothetical human structure  
191 and therefore linear constructs would need 50 orthogonal recombinases to count that high, and binary constructs only 6.

192 For the linear inversion architecture, this algorithm puts the first recombinase in the forward orientation following  
193 the promoter, and puts all subsequent ones in order in the reverse orientation, with facing recombinase sites radiating  
194 outwards (so every count flips a larger piece of DNA, and flips the next recombinase into position after the promoter)  
195 (**Figure 4c**). For the linear excision architecture, we have one promoter at the starting position and oriented forward into  
196 a gene and terminator that will get excised upon production of the recombinase before the following count (**Figure 5b**).

197 For the binary counting architecture, we use a pattern in which  $n$  recombinase/reverse-directionality-factor (a.k.a. RDF  
198 or XIS) pairs [33] can be used to count  $2^n$  genetic recombination events. If there is only one recombinase, then we put  
199 the first recombinase after the cell cycle dependent promoter. Otherwise, we begin with a forward cycle dependent  
200 promoter. Then for each recombinase in the recombinase sequence, we insert a forward attB site immediately after  
201 the initial promoter. For the first two recombinases, we then add a reverse cell cycle dependent promoter. For all  
202 recombinases, we then put the recombinase gene in the forward direction, then add a forward terminator, then, for all  
203 but the first recombinase, we add a reverse terminator followed by the RDF of the previous recombinase in the reverse  
204 direction. Finally, we add a reverse attP site for each recombinase (**Figure 4d**).

### 205 **2.3.2 A genetic register circuit expresses genes of interest at discrete genetic counts**

206 The register constructs have a constitutive promoter and orthogonal pairs of recombination sites to manipulate which  
207 genes are transcribed given which recombinase is currently expressed by the counter [34, 19] (**Figure 4d**). An algorithm  
208 designs a register circuit based on a developmental tree. This method can create a register compatible with a binary  
209 counter architecture or a linear architecture. The code begins by reserving some recombinases for use in the counter, as  
210 additional recombinases will generally be required for asymmetrical divisions in the registers. The register architecture  
211 is divided into two kinds of sub-registers - 'the final count register' and the 'frame register'. The final count register is  
212 the same for the two architectures. Note that unlike the rest of the register, this final expression register is expressed on a  
213 constitutive promoter as we need the surface proteins to be expressed despite the fact that we have halted the cell cycle.

214 For the linear registers we create a replica of the counter architecture without the recombinases and replace the  
215 recombination sites with alternative, orthogonal recombination sites to complete the frame registers. For the binary  
216 architecture, the algorithm takes the  $\log_2$  of the number of counts and rounds up to get the number of recombinases.  
217 The frame register for the final count is then determined from the binary tree - an alternating-strand architecture is  
218 employed: a central promoter that flips directions every other count with output slots fanning out on either side, counts  
219 1, 4 (rev. strand), 5, 8 (rev. strand), ... on the right and counts 2 (rev. strand), 3, 6 (rev. strand), 7, ... on the left.

### 220 **2.3.3 Recursive design of register constructs based on developmental tree**

221 A recursive function then builds the final output register that corresponds to a developmental tree (**Figure 5a**). For the  
222 linear registers, the algorithm descends the tree until it reaches the leaves, putting in required sites for asymmetrical  
223 division as necessary. Once it reaches a leaf, it creates the expression circuit for that cell, consisting of a reverse  
224 promoter that will be flipped at the cell's final count, and the genes the cell must express. Then, on the way back up,  
225 it determines if there is redundancy between two daughter cells (if they are expressing some of the same genes). If  
226 so, it moves those genes outside of the asymmetrical division recombinase sites. It also accounts for situations where  
227 one daughter cell divides more times than the other (necessitating completely separate circuits, since the final count  
228 promoters for those two cell populations must flip on at different counts).

229 For binary registers, the recursive addition of the final register and asymmetrical components is more complicated —  
230 the binary expression register requires the use of nested recombinase site pairs. The algorithm recursively descends  
231 through one side of the binary expression register, starting at the largest, exterior pair and calls itself on each interior  
232 pair until it reaches one with no interior pair (**Figure 5b**).

233 This algorithm begins by checking if there is only one count between the current sites. In this case, the count must be  
234 the 0th, 4th, 8th, ... or 1st, 5th, 9th, ... count, as the other counts cannot appear by themselves (they would always be  
235 paired with one of the counts listed previously). We can eliminate the tier 1 (the second recombinase, which flips every

236 4 counts) sites immediately surrounding this count. We must flip this final count if  $n \bmod 8 \in \{0 \bmod 8, 1 \bmod 8\}$   
237 where  $n$  is the count in order to ensure that the count is correctly oriented when it should be expressed. Next, we check  
238 to see if any of the counts between the current sites actually contain genes. If they do not, then the current sites are not  
239 necessary and we can simply put a forward and a reverse terminator in their place (these terminators are necessary to  
240 ensure that potential later counts are not expressed prematurely). Otherwise, if we are at the lowest tier (ie we have 2  
241 counts), we use the sites, put the genes for the first count in the forward direction followed by a forward terminator,  
242 then add a reverse terminator followed by the genes for the second count in the reverse direction. If we are not at the  
243 lowest tier, the function calls itself on the tier below and encloses the output in facing sites.

244 For our 3-tet shape, the register is formed in 4 recursive stages, starting from the leaves of the last two tetrahedrons to  
245 form (**Figure 5a,b**). The 'final registers' are determined and compiled upwards into the frame registers as dictated by  
246 asymmetrical divisions. While the linear and binary register conditions are different, the differences in the final register  
247 are relatively minor (**Figure 5b**).

## 248 2.4 State machines for simulating genetic circuit dynamics

249 Once a genetic circuit is designed by our software, it should function assuming perfect functionality by its components;  
250 however, any synthetic biologist could tell you that this will not be the reality. While the recombinase components are  
251 some of the most robust in the synthetic biology world and we can demonstrate very orthogonal binding behavior for  
252 some surface binding proteins, these biological components are imperfect. Furthermore, it's possible that synthetic  
253 genetic components will have unexpected interaction with endogenous genetic components. To accommodate for this  
254 imperfection, we use the mathematical model of finite state machines as a simulation framework for placing our circuits  
255 into living cells (**Figure 5a**). We argue that this framework is fitting for this problem because recombination-based  
256 circuits lend perfectly to finite-state behavior — the circuit has one starting condition and can be manipulated via  
257 recombinases to another condition where it has other behavior. Based upon experimentally-measured probabilities  
258 of a recombination event given the expression of a recombinase, we can assign real probabilities to each of the state  
259 transitions. When we couple these recombinaton events to the cell cycle and cell division, we can create a simulated  
260 cellular environment that guides individual cell behavior based upon the state of the circuit in each cell and additional  
261 environmental factors(**Figure 6a**).

262 This step inputs a genetic circuit and outputs a state machine reflecting all of the possible recombined states the circuit  
263 could end up in (nodes) and the probabilities of each state transition (edges). This state machine is represented slightly  
264 differently than the canonical state machine — in our context, we must accommodate for cell division; we have one cell  
265 in one particular state that divides into two cells, each with a possible state transition. Therefore, we represent state  
266 transitions as pairs of edges as opposed to a single edge. The computing therefore resets for each cell at the beginning  
267 of the next cell cycle (**Figure 5b**). As a consequence of this 'forking', the state machines for even a relatively simple  
268 circuit can balloon in size rather quickly. Furthermore, if we consider rare off-target events, the number of possible  
269 states also balloons, and we are left with state machines that increase in complexity exponentially. To reduce complexity  
270 of state machines, we eliminate state transitions whose probability falls below a specified threshold and its probability  
271 reassigned to other transitions from the original state (methodology explained in greater detail below). This allows us to  
272 limit the size of the state machine by decreasing the number of transitions and ignoring states that are very unlikely to  
273 ever be reached. The probability for each transition is calculated for one state going to a pair of other states, as we are  
274 hoping to tie changes to the circuits to the cell cycle using cycle-dependent promoters and degradation tags and have  
275 each circuit operation occur independently in each daughter cell soon after a cell division.

276 The algorithm to build state machines from a starting circuit starts by scanning the components and identifying the  
277 expressed genes and RDFs and checking if the cycle arrest gene is expressed. If the cycle arrest gene is expressed,  
278 then no transitions to other states are considered. For states that are not in cycle arrest, we find active recombinase  
279 site pairs (i.e. pairs of the same site ID, for the same recombinase, that are of complimentary types (eg attP and attB)  
280 and whose recombinase is active). These pairs are stored in a dictionary, and base probabilities for each site pair are  
281 looked up (the probability of a recombination event between an attB/P or attL/R site occurring given the expression of a  
282 recombinase and/or RDF), then all allowable combinations of site pairs are determined. Each combination will define a  
283 state that the current state can transition to. We next calculate the probability of those transitions — these probabilities  
284 are directly dependent on which recombinases are active in the cell. It is therefore necessary to calculate the probability  
285 of each transition for each possible set  $S_n$  of active recombinases such that  $S_n = T \cup (n \in N)$  where  $T$  is the set of all  
286 expressed recombinases.

287 The next step is to threshold transitions that have probabilities that are too low. In order to reduce memory usage,  
288 two rounds of thresholding are performed. This is necessary as the second thresholding event considers all size 2  
289 combinations of the transitions that made it through the first thresholding event. The threshold value, however, is meant

290 to be applied to the final size 2 combinations; since we are unable to calculate those immediately, it is necessary to  
291 calculate a stand-in probability for each transition for use in the first round of thresholding. The probability is:

$$P(c_1, c_2) = \begin{cases} P(c_1|A)^2 & c_1 = c_2 \\ 2 \cdot P(c_1|A) \cdot P(c_2|A) & c_1 \neq c_2 \end{cases}$$

292 where  $c_1$  and  $c_2$  are combinations of site pairs,  $A$  is the case where all recombinases are active, which equates to  
293 the probability of the first state multiplied by the probability of the second state, times 2 if the states are different  
294 since there are then two unique ways to achieve that state pair. This assumes that the efficacy of each recombinase in  
295 one daughter cell is independent from the efficacy of that same recombinase in the other daughter cell. The program  
296 determine the probabilities of each state-transition option in the following way: the combinations are sorted by the  
297 stand-in probabilities, then a binary search is used to determine the first combination whose stand-in probability is  
298 above the threshold. Subsequently, alternative combinations are generated for each combination. With large circuits,  
299 the combinatorial space of possible state transitions is immense, so when there are greater than 1000 combinations,  
300 the program does not intelligently reassign probabilities of problematic combination pairs. Rather it sums the true  
301 probabilities of these pairs and reassigns it proportionally to the other pairs according to the following formula:  
302  $P'(p) = \frac{P(p)}{1-u}$  where  $p$  is a valid pair and  $u$  is the sum of the cut probability. When there are fewer than 1001  
303 combinations, the program reassigns the probability intelligently using the previously generated lists of alternatives.

304 The 3-tet shape example has >1000 states for both linear and binary format, so we do not show this example here.  
305 Instead we show two example counters (**Figure 6b,c**) to show how the edges can be visualized and that we must  
306 accommodate for two cell divisions in this way, as each daughter cell has its own state. All state transitions from one  
307 node to all others add up to 1 and when we consider low-likelihood state transitions, the number of possible changes  
308 expands very quickly, even for 5 states as opposed to 3.

## 309 2.5 Modeling multicellular self-assembly in 4D space

310 Multicellular pattern formation is an emergent behavior in mammals that controls complex behaviors, such as embryonic  
311 development, and is tightly regulated by biochemical and mechanical cues in both 3D space and time (we refer to this as  
312 a 4D space). Currently, there are several exploratory approaches to induce multi-cellular patterning in mammalian cells  
313 using directed self-organization driven by interfacial tension [35], micro-patterned surfaces [36, 37], or biochemical  
314 signaling [38]. However, inducing these behaviors requires significant manual intervention from the experimenter or  
315 requires the assistance of artificial scaffolds. These approaches that requires manual intervention are difficult to scale up  
316 and produce more complex patterning.

317 In addition to the need for manual intervention, most approaches to control self-organization are driven by trial-and-  
318 error design which becomes increasingly difficult as multicellular systems become more complex. Briers and Libby  
319 et. al. [39], demonstrated the ability to combine a 2D Cellular Potts model with Particle Swarm Optimization to  
320 automated the design and experimentally validate 2D symmetrical patterns in human induced pluripotent stem cells.  
321 To overcome limitations of trail-and-error driven experimentation, and allow more more complex pattern formation,  
322 we have developed a computational model to simulate the self-assembly from a single cell into 3D structures with out  
323 manual intervention.

324 Once a state machine has been built for a genetic circuit, we can simulate what would happen to a cell population  
325 containing that circuit as it expands into a multi-cellular population. When modeling the role of tissue mechanics (eg  
326 cell-cell adhesion, cell migration, cell shape, haptotaxis), the most common agent-based modeling (ABM) frameworks  
327 are Cellular Automaton [40], Cellular Potts framework [41], Vertex models, Cell Center-based models (this includes  
328 particle models and rigid body models like we use in this paper), and hybrid models that combine aspects of multiple  
329 ABM frameworks [42]. We chose to model the programmatic self-assembly of K562 cells as incompressible spheres  
330 propelled by Brownian Motion. This modeling framework is appropriate since our experiments involve K562 cells that  
331 are cultured in a suspension media lacking extracellular matrix or any stiff surface for self-propulsion by individual  
332 cells. For the duration of experiments, the aqueous growth media is autonomously shaken. We model this collision of  
333 water molecules with cells as Brownian motion.

334 In each simulation, a biophysical simulation is run in which the circuit is placed in one starting cell and cells are  
335 expanded and genetically modified over time as per the state machine and external conditions. External conditions  
336 include the expression of cell surface binding proteins and Brownian motion of cells in a confined space (simulated  
337 shaking cell culture). In this case we consider the physical properties of cell line K562 [43] (**Figure 7a**). This cell line  
338 is chosen because it is an immortalized blood cell line that naturally has no surface binders. The cell line also has a  
339 spherical, generally uniform size — these properties are ideal because they allow us to model the cells as non-adhering

340 uniform spheres for which Brownian motion approximates well when these cells are shaken. In our case Brownian  
341 motion is desirable as it increases the frequency of cell-cell contacts needs to self-assemble. Cells that are confined to  
342 planar cell migration at the bottom of a dish are extremely unlikely to ever find their correct binding partners in the  
343 sparse environment with relatively few cells.

344 At the beginning of the simulation, we create one cell, giving it the density of water and a radius of 6 microns and  
345 establish the ODE objects needed to represent the cell. This cell has a counter that counts how long it has been since it  
346 was last part of a division. If the cell is allowed to divide (i.e. it is not expressing the Cycle Arrest gene), then when the  
347 count reaches twenty hours the cell divides. New states are determined for the two daughter cells based on the state  
348 machine for the circuit.

349 As the cells divide and express proteins as per the state machine, the original cell becomes one of the daughter cells,  
350 while a second daughter cell is randomly placed a half cell radius away and apply a number of important physical  
351 considerations to the cells as they move around in the environment. First, we consider the forces applied to each  
352 individual cell in isolation. When unbound to another cell, a random force  $F = F_x + F_y + F_z$  is generated and then  
353 each cell receives a force  $F' = r_1 \cdot F_x + r_2 \cdot F_y + r_3 \cdot F_z$  where  $r_1$ ,  $r_2$ , and  $r_3$  are randomly picked for each cell from  
354 a uniform distribution on  $[0.5, 1.5)$ . The correlated forces functionality was added to try to stop groups of cells from  
355 breaking apart too readily, and may in fact mirror reality more closely, given that there is no reason for connected cells  
356 to try to move in diametrically opposite directions. A drag force is also applied to the cells to try match the reality that  
357 the cells would not accelerate up to very high speeds in a liquid. The flow is assumed to be laminar (as opposed to  
358 turbulent) so the force applied is proportional to the cell's velocity.

359 Second, we also consider distances between cells and change the forces applied if they are bound to other cells — when  
360 cells are too close, they repel each other, and when cells that are connected are too far apart, the connection either  
361 breaks or the cells are pulled together (to mirror the behavior the binder proteins). For this to occur, the ODE joints  
362 between the cells must be broken as the joints try to maintain their original lengths. Thus, the joints are broken, then  
363 reformed (unless the cells are too far apart) before the Brownian motion step. If a joint is no longer valid after a division  
364 — the two cells that were bound are no longer expressing the protein(s) that bound them — then the joint is removed. Or,  
365 if a new cell is near a cell that its parent cell was bound to, and that bond is still valid, then a joint is created between the  
366 new cell and the second cell. When two cells collide during the simulation the program checks to see if the cells can  
367 bind. If so, it creates a joint and changes their velocities according to a perfectly inelastic collision model.

368 Finally we use a mass spring optimization to correct cell distances for cells that are adjacent to each other in 4D space  
369 to add reality to the simulator. We use a compression of volume based model to repel cells if they are too close, and a  
370 spring model to draw cells together if they are bound and are too distant. For each cell, we first determine if cells are  
371 near each other. Cells are sorted into a 3D grid based on their coordinates. We traverse the grid, visiting cubes that have  
372 cells with them, calculating the distance between those cells and cells in at most thirteen neighboring cubes. We only  
373 need to consider the cubes in one half of the shell around each cube, as the other half will have already been visited by  
374 the algorithm. If the distance between any two cells is too close, the pair is added to a set. Finally, all cells that are  
375 bound to each other by surface binders are also added to the set.

376 Next we calculate the forces cells exert on each other due to either being too close (compression) or bound by surface  
377 binders but too far apart. If the cells are bound and are forced far apart, the joints between cells are broken. If the cells  
378 are too close, we calculate the fraction of their volumes that is shared, and adjust the position of cells to an optimal  
379 distance of 11 microns. The volume of two overlapping sphere shaped cells  $V_d$ , having an equal radius, at a distance  $d$   
380 microns from their cell centers is define as:

$$V_d = \frac{\pi}{12}(4r + d)(r^2 - d)^2,$$

381 where  $r$  is the radius of each cell [44]. The optimal overlapping volume of two cells is defined as the shared volume of  
382 cells that have an optimal distance  $d_o$  of 11 microns between their cell centers:

$$V_o = \frac{\pi}{12}(4r + d_o)(r^2 - d_o)^2.$$

383 When cells become compressed as defined by having overlapping spherical boundaries, we can take the difference of  
384 the overlapping volume and the *optimal* overlapping volume to calculate a repulsive force that will push cells from their  
385 current distance to an optimal distance apart (11 microns). The force due to the compression  $F_c$  between two cells is  
386 calculated as:

$$F_c = k_u V_f \vec{V}_{ij},$$

387 where  $k_u$  is the spring constant for pushing cells apart,  $V_f$  is the relative percent of volume overlapping of one cells (we  
388 call this the volume fraction), and  $\vec{V}_{ij}$  is a 3D unit vector pointing from the cell  $i$  to cell  $j$ . We can consider  $k_u V_f$  as the



389 magnitude of repulsion, and  $\vec{V}_{ij}$  as the direction of repulsion. This force is equally applied to each cell that is too close  
390 to the current cell.

391 If the cells are too far apart (more than three cell radii), their joint is broken. Otherwise, a spring force is calculated —  
392  $F = k_p(d - 1)$  where  $k_p$  is a spring constant that pulls cells together and  $d$  is the distance between the cells. Once all  
393 the pairwise interactions have been considered, the forces due to the shared volumes are calculated.

394 As we show in **(Figure 7d)**, once accounting for external events including cellular biophysics **(Figure 7c)** and orthogonal  
395 surface binding (both on- and off-target as per **(Figure 7b)**), our simulations sufficiently approximate the forces of cell  
396 division, cell-cell adhesion, and Brownian Motion. This gives us confidence that as long as we model the internal  
397 genetic changes properly, the simulated spatio-temporal organization of the cell population should align closely with  
398 real cells in 4D (3D space + time) culture.

## 399 2.6 Verification of cellular growth outcomes

400 With the objective of enabling the programmatic assembly of cells into user-defined structures, a computational  
401 framework is needed to allow the user to specify a shape, design and build the required circuit, verify whether the  
402 specified shape is achieved for the candidate circuit, and determine the success rate of achieving the desired shape.  
403 Computer-aided verification allows us to test if a candidate circuit will result in the formation of the desired shape with  
404 a given probability and confidence level, eliminating the need to run many costly and time-consuming experiments.

405 In the verification step, we need to define a meaningful metric that captures different notions of the structure and  
406 design an algorithm to calculate this metric, with the goal to assign a quantitative value that can be used to compare  
407 the desired shape to the shape observed from a circuit. For this sub-problem, we use graphs to represent the desired  
408 and observed 3-dimensional structures. Each node in the undirected graph represents a cell, and the edge between  
409 two nodes demonstrates the cell-cell binding. We assume two input graphs are given in the verification step: the first  
410 graph  $G_1$  is produced from the CAD software in which the user identifies the desired shape and a graph is derived by  
411 applying meshing algorithms, and the second graph  $G_2$  is produced from the observed shape for a candidate circuit  
412 in our simulated model. The verification can be transformed into a graph matching problem that checks whether the  
413 two graphs  $G_1$  and  $G_2$  corresponding to the desired and observed shapes match. Therefore, classical graph matching  
414 algorithms [45] can be employed to solve this problem.

415 Graph similarity has been studied in various fields, from social networks [46] to biological networks [47], and many  
416 algorithms have been proposed to measure the similarity of graphs such as techniques using distance-based metrics and  
417 feature extraction [45]. We use the spectral eigenvalue similarity method [48] as the basis for our algorithm to determine  
418 the graph similarity, and propose an algorithm to calculate and score the similarity of the desired and observed graphs.  
419 Eigenvalues of a graph contain important information about its structure. For a given graph  $G$ , the degree matrix  $D$  is  
420 a diagonal matrix containing information about the degree of each node, i.e., the number of edges connected to the  
421 node. The adjacency matrix  $A$  is a square matrix with each element  $a_{i,j}$  indicating whether pairs of nodes  $i$  and  $j$  in the  
422 graph are adjacent  $a_{i,j} = 1$  or not  $a_{i,j} = 0$ . The laplacian matrix  $L$  is defined as  $L = D - A$  and is a representation  
423 of the graph and can be used to define different properties of the graph structure (e.g. connectivity) and construct a  
424 low-dimensional embedding of the graph.

425 Let  $L_1$  and  $L_2$  be the laplacian matrices of graphs  $G_1$  and  $G_2$  with  $n$  nodes, respectively. The similarity score between  
426 the two graphs is defined based on the euclidean distance of the eigenvalues  $\lambda$  of the laplacian matrices as:

$$score = \sum_{i=1}^k (\lambda_{1i} - \lambda_{2i})^2,$$

427 where  $score$  is a real non-negative number,  $\lambda_{ji}$  is the  $i^{th}$  largest eigenvalue of the graph  $j$  and  $k$  is chosen such that the  
428 top  $k$  eigenvalues contain 90% of the graph spectrum energy:

$$\min_j \left( \frac{\sum_{i=1}^k \lambda_{ji}}{\sum_{i=1}^n \lambda_{ji}} > 0.9 \right).$$

429 The eigenvalues of the laplacian matrix of a graph are invariant with respect to node permutations. Therefore, if two  
430 graphs  $G_1$  and  $G_2$  are isomorphic, i.e., the desired and observed shapes are exactly the same and possibly rotated, their  
431 laplacian matrices will have the same eigenvalues, and the  $score$  will be 0. A  $score$  closer to 0 indicates that graphs are  
432 more similar, while higher values show dissimilarity of the graphs.

433 In the considered cases the desired structure consists of substructures (blocks of tetrahedron) of cells with different  
434 expressions (colors). Therefore, we employ a 2-stage algorithm where the similarity score is determined by the similarity

435 of the overall observed structure with the desired one, augmented with the similarity of each substructure compared to a  
436 single block (tetrahedron). We use an upper-bound threshold  $\epsilon$  for which we can automatically discard simulations with  
437 a similarity *score* greater than  $\epsilon$ , i.e., we reject the circuits which yield to dissimilar shapes. Another challenge here is  
438 the fact that the observed graphs (shapes) for a given circuit can possibly have different number of nodes (cells) and  
439 edges (binding connections). To tackle this issue, we measure the similarity by comparing the desired graph with the  
440 largest connected subgraph in the observed graph. We also provide the expected probability of achieving the desired  
441 shape and determine the statistical significance of the candidate circuit.

442 For the two example shapes in (Figure 7e,f), we simulated 96 outcomes from one starting cell, resulting in a variety of  
443 scores, which is expected for this stochastic simulation process. Fortunately we saw many shapes that both appeared  
444 to be the 2-tet and 3-tet shape we wanted and got strong scores from the verification algorithm. This algorithm helps  
445 us sort through massive amounts of image to determine if we are successfully forming shapes. Since there are many  
446 different types of errors that can occur resulting in different scores that are all in relative units, a scientist must draw a  
447 line for where success is measured to determine the ultimate chance of success of a given shape.

448 In general, the proposed graph matching algorithm provides reasonable results for the case studies we consider in this  
449 paper. More advanced techniques can be employed to verify the similarity of more complex shapes. One approach is to  
450 define other shape metrics such as sphericity, as well as the graph similarity score, and apply machine learning methods  
451 to cluster (unsupervised) or classify (supervised) large sets of simulated shapes.

### 452 3 Discussion

453 This work describes a computer-aided design (CAD) software, *CellArchitect*, that can be used to create genetic circuits  
454 that can be integrated into one cell and to grow into arbitrary multi-cellular 3D shapes. It represents the first described  
455 CAD workflow for solving the developmental biology problem of shape formation entirely based on genetic circuits.  
456 While we show some simple examples end-to-end to demonstrate that each sub-problem solution is reasonable, the  
457 software is built to accommodate shapes of arbitrary size. Each individual sub-problem solution could likely be  
458 improved — however, we are the first to break the multi-cellular shape formation into solvable sub-problems with clear  
459 boundaries: 1. using a geometry to define substructures; 2. creating developmental trees to represent which cellular  
460 progenitors should be responsible for certain tasks; 3. developing genetic circuits to count cell cycles and express genes  
461 at discrete developmental time points; 4. using a finite-state-machine model to simulate genetic recombination circuits  
462 over time from a single-cell origin; 5. simulating cell growth in the context of internal (genetic circuit) behavior and  
463 external (environmental) variables in 4D; and 6. using quantitative verification methods to compare the desired shape to  
464 the shapes observed both *in silico* and *in vitro*. This method or others like it will likely be needed to execute complicated  
465 synthetic developmental behavior — human cells simply take too long to grow for trial-and-error approaches to be  
466 debugged on any reasonable time scale.

467 While we defined sub-problems that must be solved for shape formation and provided solutions for each of these areas,  
468 there are some limitations of these solutions that must be built on in future work to allow this software to scale properly.  
469 First, the state-machine solution does not scale well with increasingly complicated genetic circuits, so we choose to  
470 ignore rare events. Even in this case, the computational cost of making these determinations gets very high — this  
471 will need to be addressed for larger cells masses. Similar problems exist for the simulation framework — the cell-cell  
472 interactions complexity also scales exponentially. These bio-physical and genetic assumptions will need to be revisited  
473 and improved upon in future versions of this software.

474 Some sub-problem solutions are also potentially useful for other applications or future projects in different offshoot  
475 projects. Specifically, the developmental tree is a potentially interesting idea in problems not specifically related to  
476 shape formation. Many different types of events happen during development, such as the expression of certain signaling  
477 factors. Mapping back cell division events and identifying asymmetrical events and when cells stop proliferating. This  
478 model might be useful for those types of problems as well. Our developments in automated genetic circuit design  
479 for developmental biology might also be useful for other applications. As with the developmental tree, it would be  
480 potentially useful for problems outside of shape formation, such as the inclusion of genes to change cell type. It is  
481 already an open challenge to get cell masses of heterogeneous cell type composition, so using our counter constructs to  
482 signal differentiation and asymmetrical division during specific time points in development could be useful outside  
483 of shape alone. Furthermore, our developments in adding the first known framework for simulating the impacts of a  
484 genetic circuit over time based upon component characterization data could be applied to recombinase-based circuits  
485 outside the context of human or developmental biology. Combined with the automated genetic circuit design, these  
486 two modules could be applied in many different types of genetic circuits in different types of organisms to simulate  
487 outcomes of system-level behavior with synthetic biology circuits.

488 While we have attempted to create a framework for solving the challenging problem of shape formation, the larger  
489 idea was to develop a new framework for thinking about ‘synthetic developmental biology’. While there are certainly  
490 other exciting approaches to scaling up tissue engineering and developmental biology applications, we have added  
491 a new framework for genetics and synthetic biology to synergize with other complementary technologies. For  
492 example, 3D bioprinting might be a good tool to form larger structures with populations of cells, but it still might  
493 be important to genetically form certain small-scale structures over time in a tissue. While we generally overlook  
494 complex media condition manipulations in our current work, all cells must grow in media, and so future extensions  
495 to include considerations for this could be highly beneficial. This work also complements well with existing work to  
496 differentiate cells with transcription factors — the combination of the ability to change cell type and multi-cellular  
497 shape autonomously in the same genetic system could lead to the creation of novel tissue-like structures that might be  
498 hard to create with tools like 3D-bioprinting.

## 499 4 Methods

500 All algorithms and software are implemented in Python 3 using numpy, panda3d, matplotlib, dnaplotlib, and psutil. The  
501 cell simulator uses Open Dynamics Engine (ODE) as a physics engine, as implemented by the panda3D package (note  
502 that the underlying ODE framework is implemented in C++). Cell simulation visualization is performed in ParaView.  
503 Large computing jobs were carried out on a Linux-based computing cluster.

## 504 5 Acknowledgments

505 EA, TD, MM, GC, and TW developed meshing and genetic circuit software components. EA, NM, TD, DB, IH,  
506 ACP, and CB developed the simulation and verification software. GC and TW provided data for physical simulation  
507 parameters. EA, GC, TW, and GC devised the preliminary vision of the project. EA, NM, TD, DB, CB, and GC wrote  
508 the paper. The authors would like to thank Justin Gallivan, Jesse Dill, Blake Bextine, Nathaniel Borders, Clair Travis,  
509 and Helene Kuchwara for helpful conversations. This work was supported by the DARPA ELM Program under contract  
510 W911NF-17-2-0079.

## 511 References

- 512 [1] Madeline A Lancaster and Juergen A Knoblich. Organogenesis in a dish: modeling development and disease  
513 using organoid technologies. *Science*, 345(6194):1247125, 2014.
- 514 [2] Kazutoshi Takahashi, Koji Tanabe, Mari Ohnuki, Megumi Narita, Tomoko Ichisaka, Kiichiro Tomoda, and  
515 Shinya Yamanaka. Induction of pluripotent stem cells from adult human fibroblasts by defined factors. *cell*,  
516 131(5):861–872, 2007.
- 517 [3] Thomas Graf and Tariq Enver. Forcing cells to change lineages. *Nature*, 462(7273):587, 2009.
- 518 [4] Marius Ader and Elly M Tanaka. Modeling human development in 3d culture. *Current opinion in cell biology*,  
519 31:23–28, 2014.
- 520 [5] Sean V Murphy and Anthony Atala. 3d bioprinting of tissues and organs. *Nature biotechnology*, 32(8):773, 2014.
- 521 [6] Xiaolei Yin, Benjamin E Mead, Helia Safaee, Robert Langer, Jeffrey M Karp, and Oren Levy. Engineering stem  
522 cell organoids. *Cell stem cell*, 18(1):25–38, 2016.
- 523 [7] Alessia Deglincerti, Gist F Croft, Lauren N Pietila, Magdalena Zernicka-Goetz, Eric D Siggia, and Ali H Brivanlou.  
524 Self-organization of the in vitro attached human embryo. *Nature*, 533(7602):251, 2016.
- 525 [8] Marta N Shahbazi, Agnieszka Jedrusik, Sanna Vuoristo, Gaelle Recher, Anna Hupalowska, Virginia Bolton,  
526 Norah ME Fogarty, Alison Campbell, Liani G Devito, Dusko Ilic, et al. Self-organization of the human embryo in  
527 the absence of maternal tissues. *Nature cell biology*, 18(6):700, 2016.
- 528 [9] Satoshi Toda, Lucas R Blauch, Sindy KY Tang, Leonardo Morsut, and Wendell A Lim. Programming self-  
529 organizing multicellular structures with synthetic cell-cell signaling. *Science*, 361(6398):156–162, 2018.
- 530 [10] Timothy S Gardner, Charles R Cantor, and James J Collins. Construction of a genetic toggle switch in escherichia  
531 coli. *Nature*, 403(6767):339, 2000.
- 532 [11] Michael B Elowitz and Stanislas Leibler. A synthetic oscillatory network of transcriptional regulators. *Nature*,  
533 403(6767):335, 2000.
- 534 [12] Alvin Tamsir, Jeffrey J Tabor, and Christopher A Voigt. Robust multicellular computing using genetically encoded  
535 nor gates and chemical ‘wires’. *Nature*, 469(7329):212, 2011.

- 536 [13] Ari E Friedland, Timothy K Lu, Xiao Wang, David Shi, George Church, and James J Collins. Synthetic gene  
537 networks that count. *science*, 324(5931):1199–1202, 2009.
- 538 [14] Jennifer AN Brophy and Christopher A Voigt. Principles of genetic circuit design. *Nature methods*, 11(5):508,  
539 2014.
- 540 [15] Evan Appleton, Curtis Madsen, Nicholas Roehner, and Douglas Densmore. Design automation in synthetic  
541 biology. *Cold Spring Harbor perspectives in biology*, 9(4):a023978, 2017.
- 542 [16] Alec AK Nielsen, Bryan S Der, Jonghyeon Shin, Prashant Vaidyanathan, Vanya Paralanov, Elizabeth A Strychal-  
543 ski, David Ross, Douglas Densmore, and Christopher A Voigt. Genetic circuit design automation. *Science*,  
544 352(6281):aac7341, 2016.
- 545 [17] Lauren B Andrews, Alec AK Nielsen, and Christopher A Voigt. Cellular checkpoint control using programmable  
546 sequential logic. *Science*, 361(6408):eaap8987, 2018.
- 547 [18] Benjamin H Weinberg, NT Hang Pham, Leidy D Caraballo, Thomas Lozanoski, Adrien Engel, Swapnil Bhatia,  
548 and Wilson W Wong. Large-scale design of robust genetic circuits with multiple inputs and outputs for mammalian  
549 cells. *Nature biotechnology*, 35(5):453, 2017.
- 550 [19] Nathaniel Roquet, Ava P Soleimany, Alyssa C Ferris, Scott Aaronson, and Timothy K Lu. Synthetic recombinase-  
551 based state machines in living cells. *Science*, 353(6297):aad8559, 2016.
- 552 [20] Lei Yang, Alec AK Nielsen, Jesus Fernandez-Rodriguez, Conor J McClune, Michael T Laub, Timothy K Lu, and  
553 Christopher A Voigt. Permanent genetic memory with > 1-byte capacity. *Nature methods*, 11(12):1261, 2014.
- 554 [21] Nicolas Moës, John Dolbow, and Ted Belytschko. A finite element method for crack growth without remeshing.  
555 *International journal for numerical methods in engineering*, 46(1):131–150, 1999.
- 556 [22] Dietmar Ulrich, Bert van Rietbergen, Harrie Weinans, and Peter Rügsegger. Finite element analysis of trabecular  
557 bone structure: a comparison of image-based meshing techniques. *Journal of biomechanics*, 31(12):1187–1192,  
558 1998.
- 559 [23] Fabio Lapenta, Jana Aupič, Žiga Strmšek, and Roman Jerala. Coiled coil protein origami: from modular design  
560 principles towards biotechnological applications. *Chemical Society Reviews*, 47(10):3530–3542, 2018.
- 561 [24] Zibo Chen, Scott E Boyken, Mengxuan Jia, Florian Busch, David Flores-Solis, Matthew J Bick, Peilong Lu,  
562 Zachary L VanAernum, Aniruddha Sahasrabudde, Robert A Langan, et al. Programmable design of orthogonal  
563 protein heterodimers. *Nature*, 565(7737):106, 2019.
- 564 [25] Todd Grimm. *User’s Guide to Rapid Prototyping*. Society of Manufacturing Engineers, 2004.
- 565 [26] John H Conway and Salvatore Torquato. Packing, tiling, and covering with tetrahedra. *Proceedings of the National  
566 Academy of Sciences*, 103(28):10612–10617, 2006.
- 567 [27] Roberto Solis-Oba. 2-approximation algorithm for finding a spanning tree with maximum number of leaves. In  
568 *European Symposium on Algorithms*, pages 441–452. Springer, 1998.
- 569 [28] Joseph B Kruskal. On the shortest spanning subtree of a graph and the traveling salesman problem. *Proceedings  
570 of the American Mathematical society*, 7(1):48–50, 1956.
- 571 [29] John P Cogswell, Michele M Godlevski, Michele Bonham, John Bisi, and Lee Babiss. Upstream stimulatory  
572 factor regulates expression of the cell cycle-dependent cyclin b1 gene promoter. *Molecular and cellular biology*,  
573 15(5):2782–2790, 1995.
- 574 [30] Asako Sakaue-Sawano, Hiroshi Kurokawa, Toshifumi Morimura, Aki Hanyu, Hiroshi Hama, Hatsuki Osawa,  
575 Saori Kashiwagi, Kiyoko Fukami, Takaki Miyata, Hiroyuki Miyoshi, et al. Visualizing spatiotemporal dynamics  
576 of multicellular cell-cycle progression. *Cell*, 132(3):487–498, 2008.
- 577 [31] Bing Hu, Jayashree Mitra, Sander van den Heuvel, and Greg H Enders. S and g2 phase roles for cdk2 revealed by  
578 inducible expression of a dominant-negative mutant in human cells. *Molecular and Cellular Biology*, 21(8):2755–  
579 2766, 2001.
- 580 [32] Ta-Jen Liu, Adel K El-Naggar, Timothy J McDonnell, Kim D Steck, Mary Wang, Dorothy L Taylor, and Gary L  
581 Clayman. Apoptosis induction mediated by wild-type p53 adenoviral gene transfer in squamous cell carcinoma of  
582 the head and neck. *Cancer research*, 55(14):3117–3122, 1995.
- 583 [33] Jerome Bonnet, Pakpoom Subsoontorn, and Drew Endy. Rewritable digital data storage in live cells via engineered  
584 control of recombination directionality. *Proceedings of the National Academy of Sciences*, 109(23):8884–8889,  
585 2012.



- 586 [34] Sean D Colloms, Christine A Merrick, Femi J Olorunniji, W Marshall Stark, Margaret CM Smith, Anne Osbourn,  
587 Jay D Keasling, and Susan J Rosser. Rapid metabolic pathway assembly and modification using serine integrase  
588 site-specific recombination. *Nucleic acids research*, 42(4):e23–e23, 2013.
- 589 [35] Satoshi Toda, Lucas R. Blauch, Sindy K.Y. Tang, Leonardo Morsut, and Wendell A. Lim. Programming self-  
590 organizing multicellular structures with synthetic cell-cell signaling. *Science*, 361(6398):156–162, 2018.
- 591 [36] Aryeh Warmflash, Benoit Sorre, Fred Etoc, Eric D Siggia, and Ali H Brivanlou. A method to recapitulate early  
592 embryonic spatial patterning in human embryonic stem cells. *Nature Methods*, 11:847, jun 2014.
- 593 [37] Jared M. Molitoris, Saurabh Paliwal, Rajesh B. Sekar, Robert Blake, JinSeok Park, Natalia A. Trayanova,  
594 Leslie Tung, and Andre Levchenko. Precisely parameterized experimental and computational models of tissue  
595 organization. *Integr. Biol.*, 8:230–242, 2016.
- 596 [38] Chad M. Glen, Todd C. McDevitt, and Melissa L. Kemp. Dynamic intercellular transport modulates the spatial  
597 patterning of differentiation during early neural commitment. *Nature Communications*, 2018.
- 598 [39] Demarcus Briers, Ashley R.G. Libby, Iman Haghighi, David A. Joy, Bruce R. Conklin, Calin Belta, and Todd C.  
599 McDevitt. Self-Organized Pluripotent Stem Cell Patterning by Automated Design. *SSRN Cell Press Sneak Peak*,  
600 2019.
- 601 [40] J. J. Vaca-González, M. L. Gutiérrez, J. M. Guevara, and D. A. Garzón-Alvarado. Cellular automata model for  
602 human articular chondrocytes migration, proliferation and cell death: An in vitro validation. *In Silico Biology*,  
603 12(3-4):83–93, January 2017.
- 604 [41] A Voss-Bohme. Multi-scale modeling in morphogenesis: a critical analysis of the cellular Potts model. *PLoS*  
605 *ONE*, 7(9):e42852, 2012.
- 606 [42] Harriet B. Taylor, Anaïs Khuong, Zhonglin Wu, Qiling Xu, Rosalind Morley, Lauren Gregory, Alexei Poliakov,  
607 William R. Taylor, and David G. Wilkinson. Cell segregation and border sharpening by eph receptor–ephrin-  
608 mediated heterotypic repulsion. *Journal of The Royal Society Interface*, 14(132), 2017.
- 609 [43] Leif C Andersson, Kenneth Nilsson, and Carl G Gahmberg. K562—a human erythroleukemic cell line. *Internation-*  
610 *ational journal of cancer*, 23(2):143–147, 1979.
- 611 [44] Eric W. Weisstein. Sphere-Sphere Intersection, 2017.
- 612 [45] Donatello Conte, Pasquale Foggia, Carlo Sansone, and Mario Vento. Thirty years of graph matching in pattern  
613 recognition. *International journal of pattern recognition and artificial intelligence*, 18(03):265–298, 2004.
- 614 [46] Mark EJ Newman, Duncan J Watts, and Steven H Strogatz. Random graph models of social networks. *Proceedings*  
615 *of the National Academy of Sciences*, 99(suppl 1):2566–2572, 2002.
- 616 [47] Georgios A Pavlopoulos, Maria Secrier, Charalampos N Moschopoulos, Theodoros G Soldatos, Sophia Kossida,  
617 Jan Aerts, Reinhard Schneider, and Pantelis G Bagos. Using graph theory to analyze biological networks. *BioData*  
618 *mining*, 4(1):10, 2011.
- 619 [48] Danai Koutra, Ankur Parikh, Aaditya Ramdas, and Jing Xiang. Algorithms for graph similarity and subgraph  
620 matching. In *Proc. Ecol. Inference Conf*, volume 17, 2011.

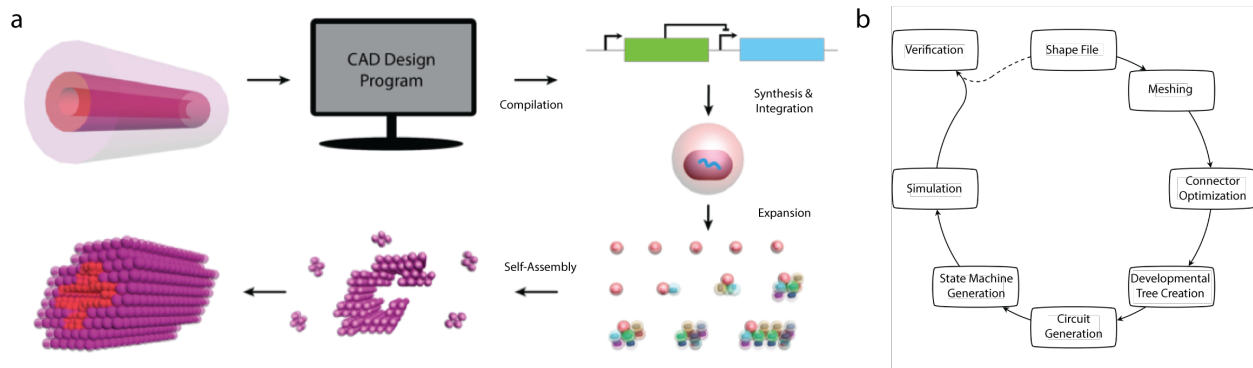

Figure 1: Goal and overview of the software tool process. a. The CAD software inputs a shape file, compiles it to a genetic circuit, which is then synthesized and integrated into the genome of a cell. This cell expands and self-assembles into the desired shape. b. The CAD software sub-problems and how they link together.

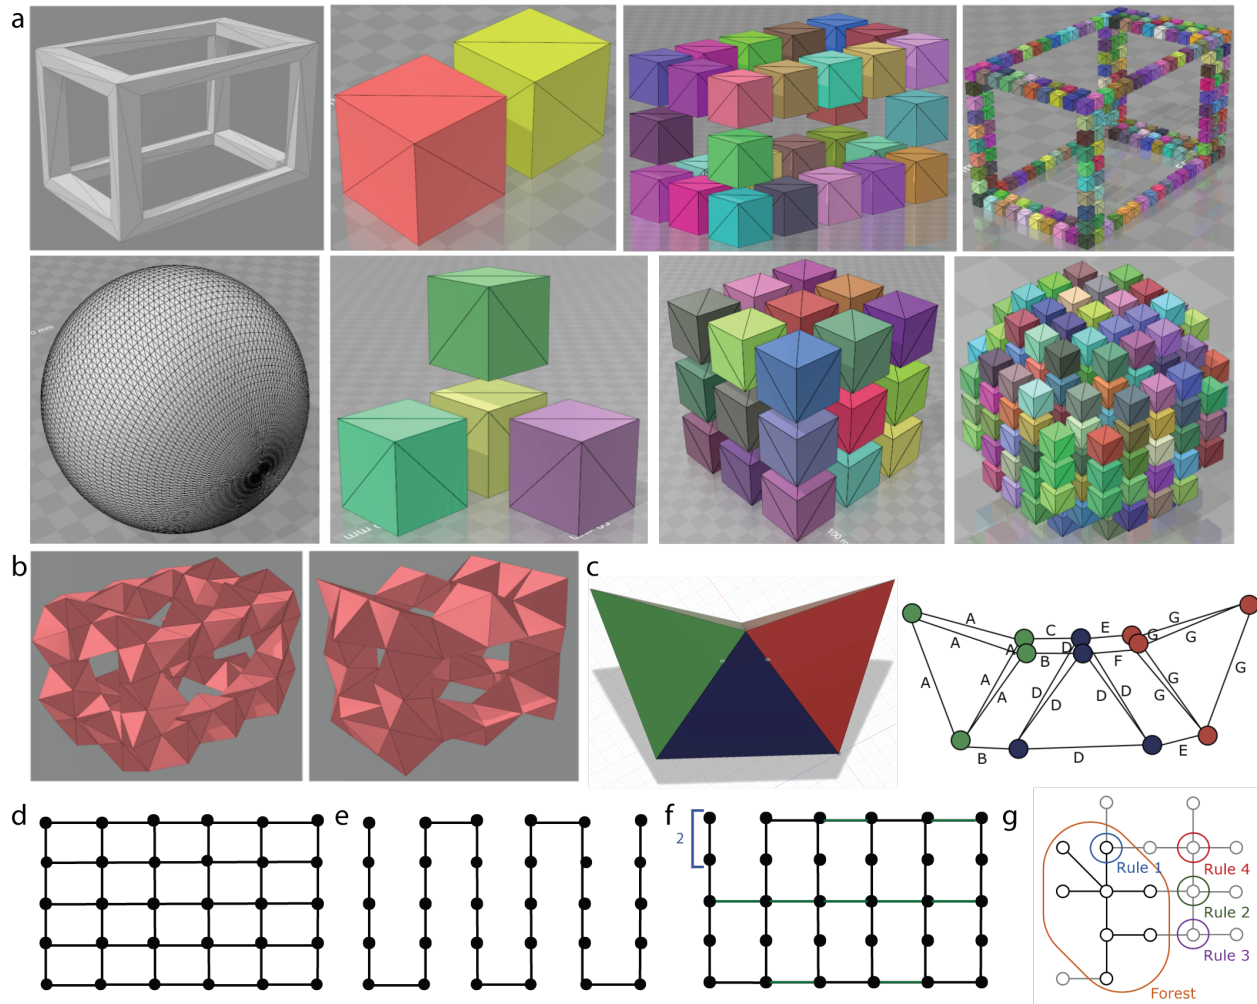

Figure 2: Meshing and connection optimization. a. Two example shapes rendered from an STL file and how they are meshed into cubic approximations of variable numbers of cells. The top row shows how a hollow box would be meshed into a 16-, 256-, and 2048-cell approximation as quads. The bottom row shows how a sphere would be meshed into a 32-, 256-, and 2048-cell approximation as quads. b. The hollow box from 'a.' meshed into tets using the 'Irish Bubble' meshing algorithm. c. A toy shape can be meshed into 3 tets that interface one another composed of 12 cells. Using the MLST algorithm, we can determine where linkages need to be placed to hold the shape together. d. A fully connected graph where all possible linkages between components are preserved. e. The MST algorithm starts with a fully connected graph and finds a random path of linkages to hold all of the nodes together. f. To reduce floppiness of an MST, we traverse the MST graph adding connections to nodes with only 2 connections. g. The MLST algorithm uses prioritized heuristics to traverse the graph and add linkages based on these heuristics.

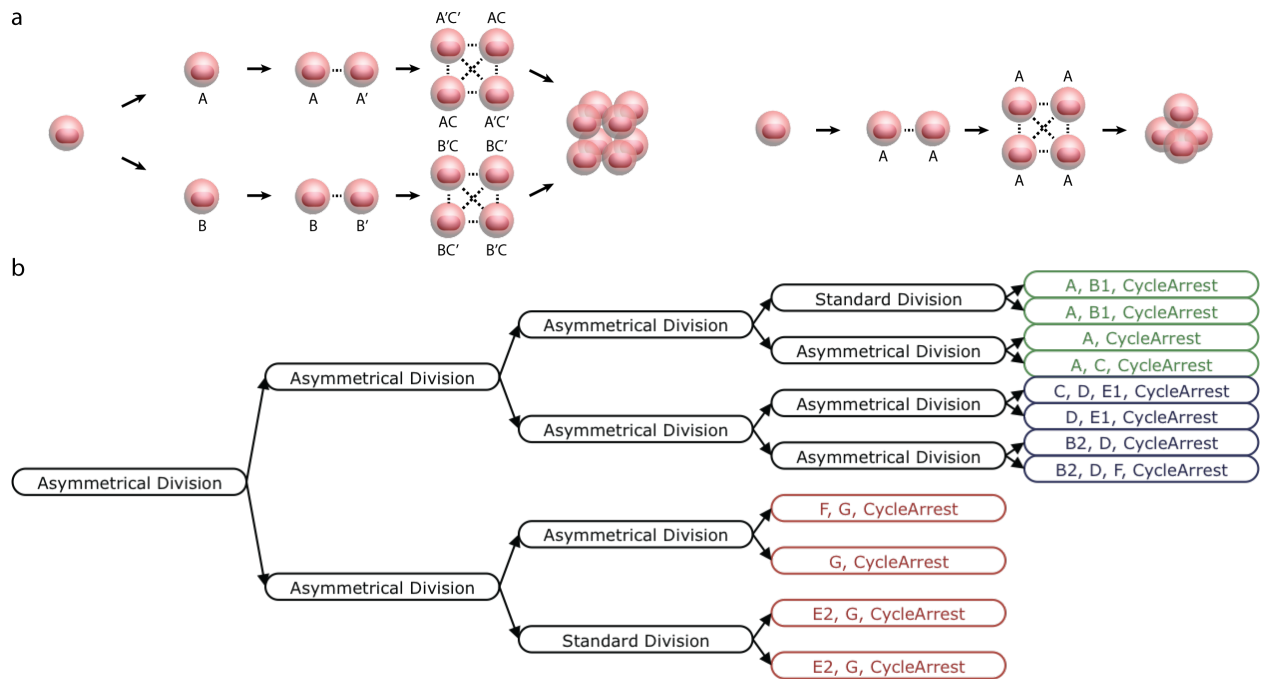

Figure 3: Developmental trees are produced from lists of blocks and connections they must form. a. Each tet block is made from a single homodimer (protein A) and each quad block from three orthogonal heterodimer pairs (proteins A/A', B/B', and C/C'). b. Starting from the final cells that must exist in a shape, a binary tree can be created to determine how many divisions must happen to form all of the blocks and optimize where asymmetrical divisions must occur.



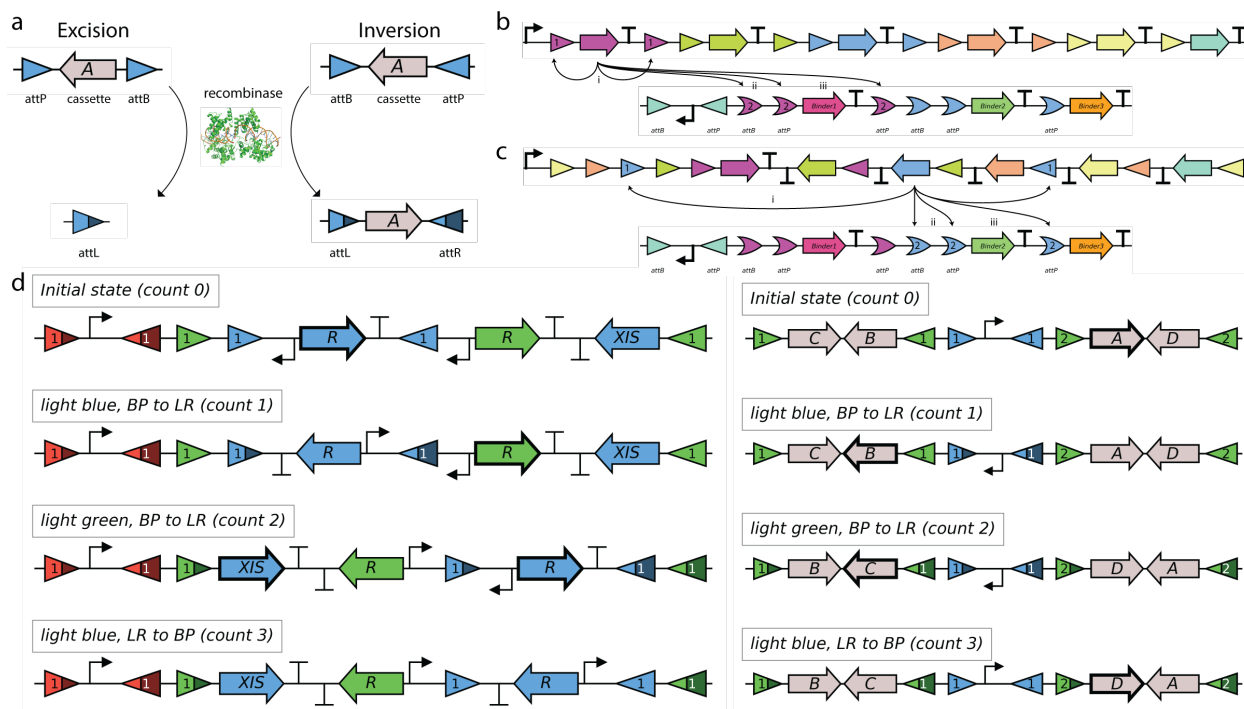

Figure 4: Genetic recombination for genetic circuits that count cell divisions. In this figure, all promoters are cell-cycle dependent promoters that initiate transcription for less time than it takes to produce a mature protein from the transcript it initiates. a. Serine integrases recognize pairs of recognition sites called attB/attP and attL/attR sites. attB/attP sites are converted to attL/attR upon recombination and upon use of an RDF they can be reverted to attB/P. When the recombinase sites are on the same strand the internal DNA is excised and discarded, when the recombinase sites are on opposing strands, the recombinase inverts the DNA in the middle. b. A linear excision counter and register. In the first count, a recombinase expression transcript is initiated and once it is fully mature, it excises regions from both the counter and register (pictured in maroon). In this example, we also show how using orthogonal recombination site pairs ('1' and '2') allow us to perform asymmetrical divisions — when the recombinase is expressed, it will perform excision 'i', but either 'ii' or 'iii', not both, since 'ii' makes 'iii' not possible and vice-versa. After recombination, the next recombinase is exposed for transcription. c. A linear inversion counter and linear excision register. These constructs are similar to linear excision devices, except DNA strands are inverted to advance counts. Asymmetrical division is illustrated with the blue recombinase as per in 'c', except that the recombinase will flip the counter DNA and excise the register DNA. d. A binary inversion counter and register. These constructs use inversion like the linear inversion circuits, but also use RDFs (a.k.a. XIS genes) to convert attL/attR sites back to attB/attP sites, again inverting the DNA in the process. Because it uses these RDFs to 'flip back' sections of DNA, it counts in binary and can accomplish  $2^n$  operations per recombinase.

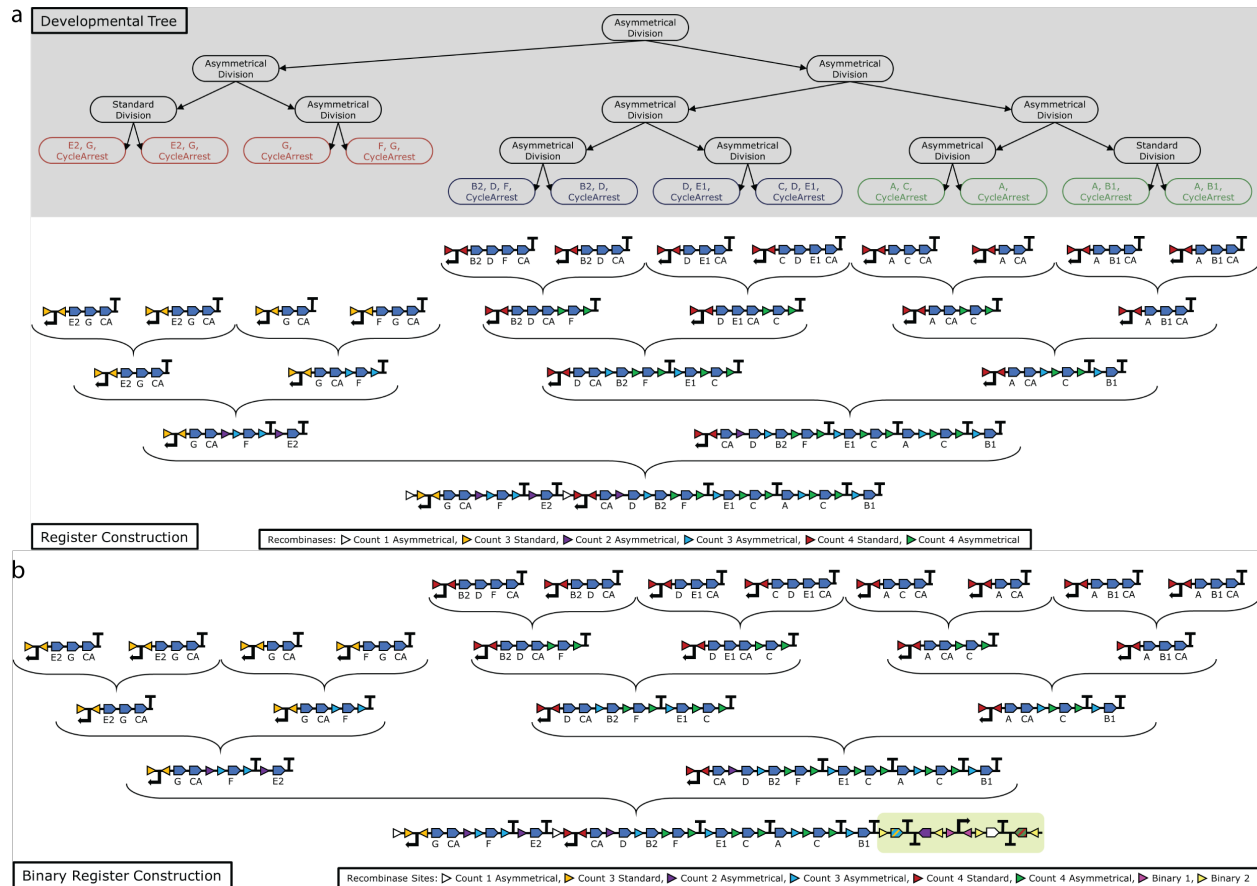

Figure 5: A genetic register is built recursively based on the developmental tree input. This register is built for the 3-tet shape using its developmental tree as input. After optimization to minimize asymmetrical divisions, final expression circuits are given to the final steps and built upwards using asymmetrical division conventions using multi-recombination. a. A linear excision register. built recursively from the 'leaves' b. A binary inversion register built recursively from the 'leaves'. The addition to this register that demonstrates the difference between this and the linear register is highlighted in yellow

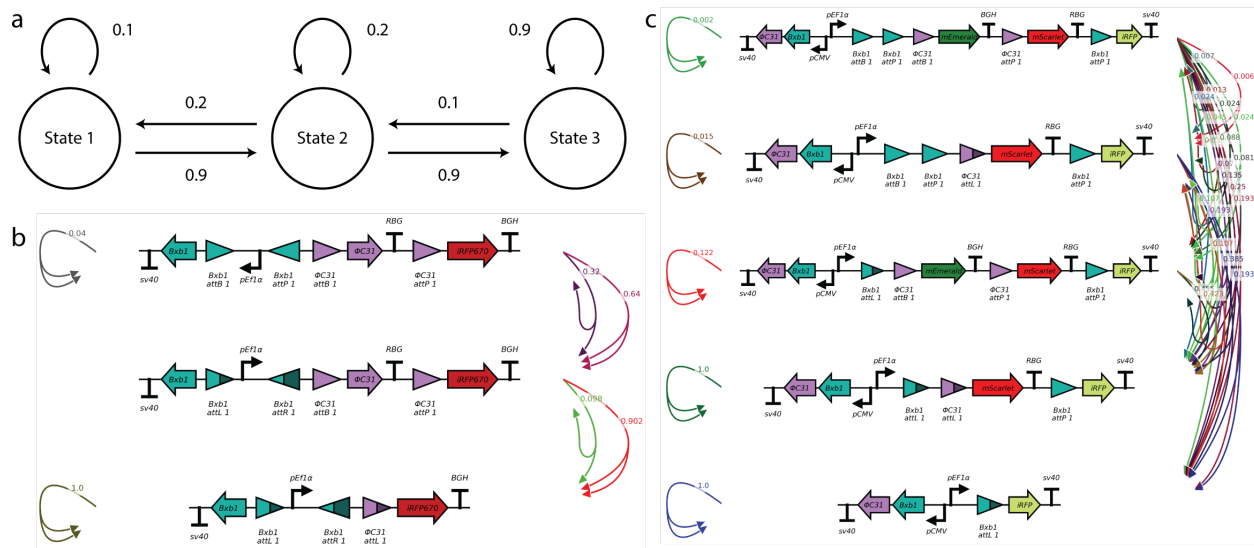

Figure 6: State machines are used in the physical simulation to determine internal cellular conditions. a. An example state machine with 3 states — upon any event, the object has assigned probabilities of transitioning to other states or remaining in the same state. These probabilities all must add up to 1. b. A state machine for a toy recombinase circuit. Since each cell divides into two cells, each of which has a different recombination (state transition) event, state transitions are calculated for pairs of outcomes (i.e. one daughter cell undergoes recombination, the other remains unrecombined at that time). c. A state machine for a counter with five states. We can see that as we consider all of the off-target recombination activities that are possible, the number of edges expands exponentially.

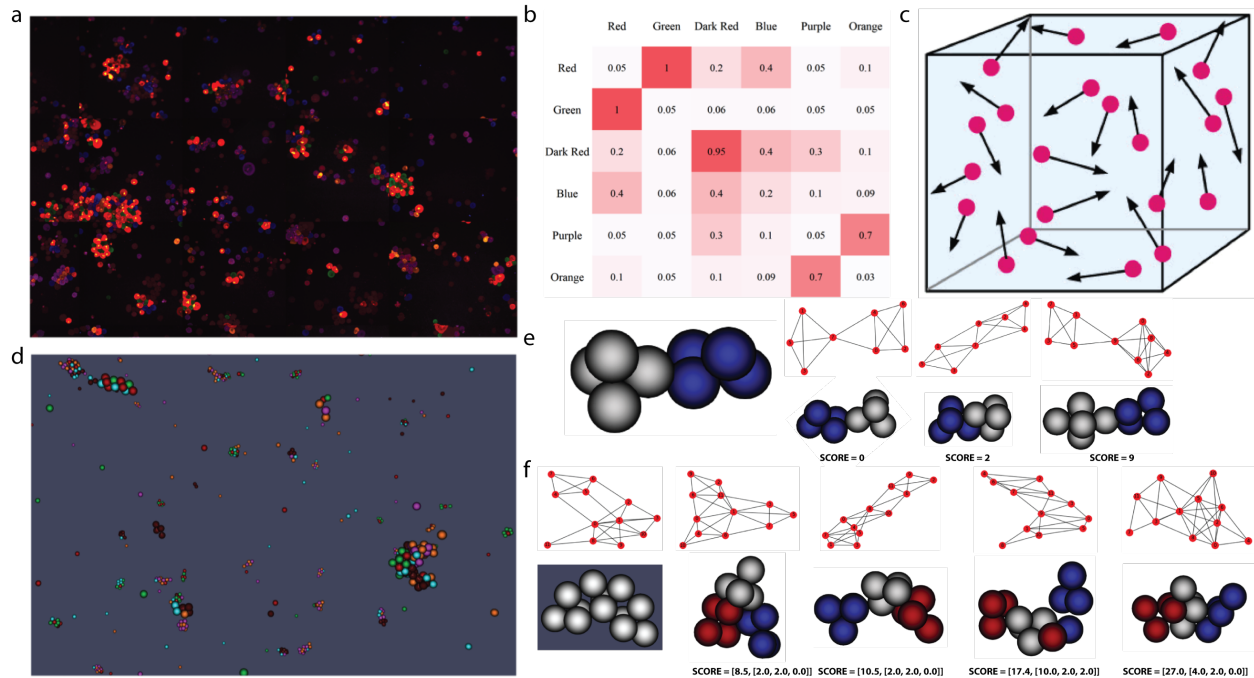

Figure 7: Physical simulation and verification. a. Mixture of 6 cell populations expression 3 orthogonal pairs of heterodimer surface binding pairs in K562 cell line. b. Based upon observation of microscopy data in ‘a’, a matrix of relative binding efficiency could be created. c. Physical conditions approximated by the physical model — cells are moving around a confined 3D space in Brownian motion. d. Simulation results for the number of cells present in ‘a’ with our model. e. Modeling and verification of a 2-tetrahedron shape. Upon applying the full modeling scheme to input shapes, the verification algorithm can compare simulated outcomes to the initial specification to determine frequency of success for this circuit. On the left is the desired shape and 3 simulated outcomes and their corresponding connectivity graph used to calculate verification score. f. Modeling and verification of the 3-tetrahedron shape. At the left is the specified shape and its corresponding connectivity graph. We show increasing scores (i.e. worse outcomes) of simulations from left to right. The scores are determined both for overall shape (left in brackets) and for individual tetrahedron formation (right in brackets).
